# Supplementary material
Source: PubMed Central journal article supplement (PMC7440757)
Supplement: IAI.00105-20-s0001.pdf [file IAI.00105-20-s0001.pdf]

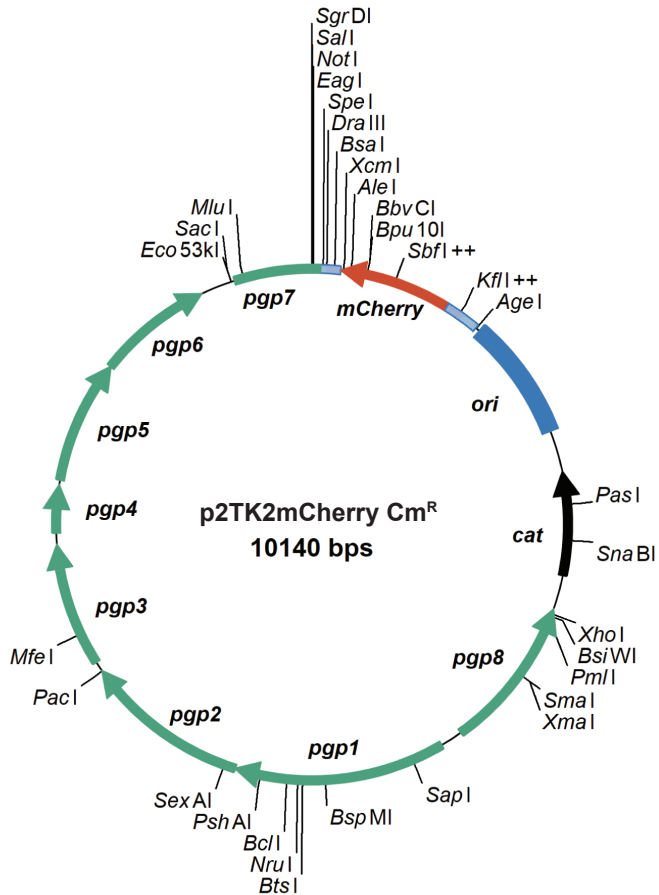

**Supplemental Figure 1:** Map of p2TK2mCherry Cm<sup>R</sup> transformed into *C. trachomatis* CTE3024. The generated strain is denoted as CTE3024-mCherry
