# Supplementary material
Source: PubMed Central journal article supplement (PMC7440757)
Supplement: IAI.00105-20-s0002.pdf [file IAI.00105-20-s0002.pdf]

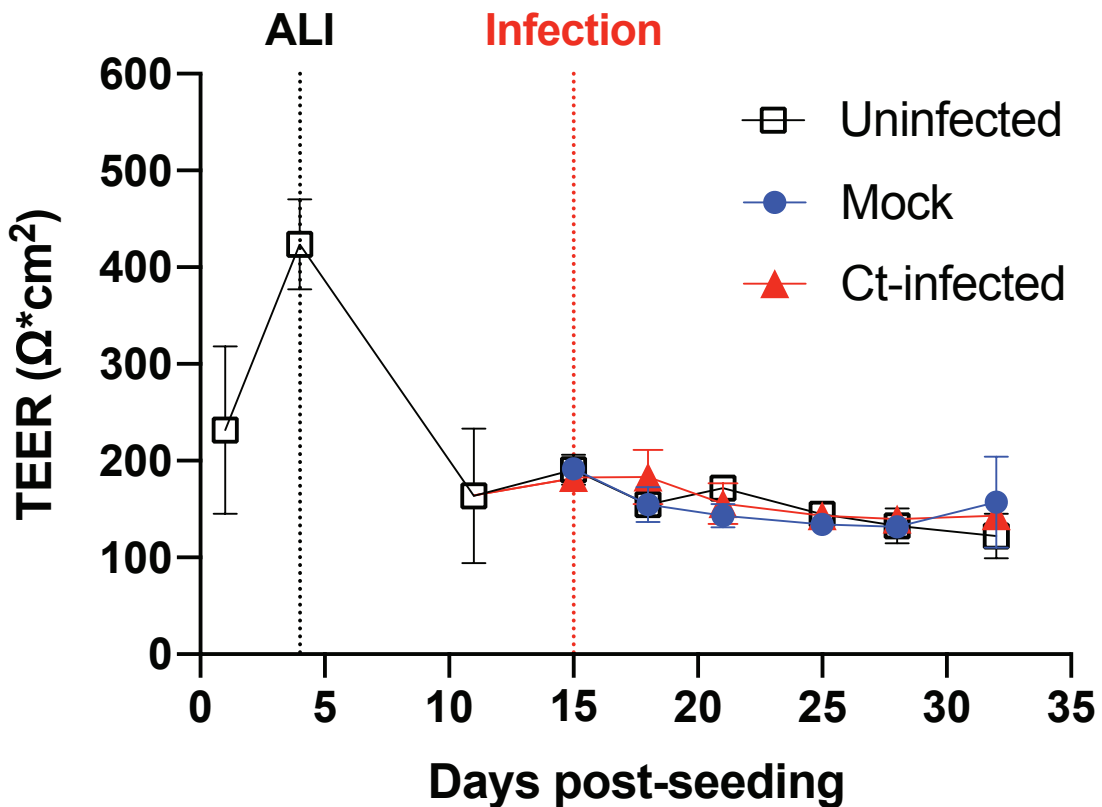

**Supplemental Figure 2: FTE cells maintain TEER after polarization, despite *Chlamydia* infection.** Cells were transitioned to ALI 4 days after seeding, N = 5 cultures. TEER measurements were obtained at the indicated time points from uninfected, mock-infected, or cells infected with CTE3024-mCherry (10 MOI). Uninfected: N = 11 cultures prior to infection and 5 post infection, Infected or mock: N = 3 cultures. Error bars represent SD.
