# Supplementary material
Source: PubMed Central journal article supplement (PMC7440757)
Supplement: IAI.00105-20-s0004.pdf [file IAI.00105-20-s0004.pdf]

**Supplemental Video 1: Primary human FTE cells cultured in an ALI form beating cilia and cobblestone structures.** FTE cells were polarized and video at real-time speed of beating cilia was obtained 7 days post-ALI.

**Supplemental Video 2: Primary human FTE cells cultured in an ALI maintain beating cilia and cobblestone structures.** FTE cells were polarized and video at real-time speed of beating cilia was obtained 45 days post-ALI.
